# Supplementary material
Source: MDPI journal article supplement (https://www.mdpi.com/1424-2818/14/4/262)
Supplement: s1 [file s1]

**Table S1. List of specimen samples used in this study**

| Sample ID | Family        | Identification         | Sample obtained | GenBank Accessions |            |          | Sampling information |                      |           |           |            |
|-----------|---------------|------------------------|-----------------|--------------------|------------|----------|----------------------|----------------------|-----------|-----------|------------|
|           |               |                        |                 | rbcL               | matK       | ITS2     | Province             | Region               | Latitude  | Longitude | Elevation  |
| MPAD18    | Amaranthaceae | Achyranthes aspera     | Present Study   | OM039336           | OM039370   | OM039401 | Abu Dhabi            | Al Ain               | 24.198867 | 55.716355 | 251.445816 |
| MPAD19    | Amaranthaceae | Achyranthes aspera     | Present Study   | OM039337           | OM039371   | OM039402 | Abu Dhabi            | Al Ain               | 24.198867 | 55.716355 | 251.445816 |
| MPRK55    | Amaranthaceae | Achyranthes aspera     | Present Study   | OM039338           | OM039372   | NA       | Ras Al-Khaimah       | Jais mountain        | 307       | 0         | 0          |
|           | Amaranthaceae | Aerva javanica         | GenBank         | KU365413.1         | NA         | NA       |                      |                      |           |           |            |
|           | Amaranthaceae | Aerva javanica         | GenBank         | KX957747.1         | NA         | NA       |                      |                      |           |           |            |
|           | Amaranthaceae | Aerva javanica         | GenBank         | NA                 | KU204823.1 | NA       |                      |                      |           |           |            |
|           | Amaranthaceae | Aerva javanica         | GenBank         | NA                 | KY000487.1 | NA       |                      |                      |           |           |            |
| MPSH8     | Amaranthaceae | Aerva javanica         | Present Study   | OM039335           | OM039369   | OM039400 | Sharjah              | Al-Dhaid             | 25.2672   | 55.9137   | 132.588    |
| MPSH96    | Amaranthaceae | Aerva javanica         | Present Study   | OM039332           | OM039366   | OM039397 | Sharjah              | Malaiha mount        | 25.104472 | 55.828279 | 192        |
| MPSH97    | Amaranthaceae | Aerva javanica         | Present Study   | OM039334           | OM039368   | OM039399 | Sharjah              | Malaiha mount        | 25.104472 | 55.828279 | 192        |
| MPSH98    | Amaranthaceae | Aerva javanica         | Present Study   | OM039333           | OM039367   | OM039398 | Sharjah              | Malaiha mount        | 25.104472 | 55.828279 | 192        |
|           | Amaranthaceae | Amaranthus hybridus    | GenBank         | KX015735.1         | NA         | NA       |                      |                      |           |           |            |
|           | Amaranthaceae | Amaranthus viridis     | GenBank         | KX015746.1         | NA         | NA       |                      |                      |           |           |            |
|           | Amaranthaceae | Atriplex leucoclada    | GenBank         | KU757314.1         | NA         | NA       |                      |                      |           |           |            |
|           | Amaranthaceae | Atriplex leucoclada    | GenBank         | NA                 | KU757313.1 | NA       |                      |                      |           |           |            |
|           | Amaranthaceae | Haloxylon persicum     | GenBank         | KX015755.1         | NA         | NA       |                      |                      |           |           |            |
| MPDB4     | Amaranthaceae | Haloxylon salicornicum | Present Study   | NA                 | NA         | NA       | Dubai                | Nazwa                | 24.990055 | 55.663009 | 172        |
| MPSH13    | Amaranthaceae | Haloxylon salicornicum | Present Study   | OM039322           | OM039356   | OM039390 | Sharjah              | Al-Dhaid             | 25.278    | 55.8277   | 115.214    |
| MPSH5     | Amaranthaceae | Haloxylon salicornicum | Present Study   | OM039321           | OM039355   | OM039389 | Sharjah              | Al-Dhaid             | 25.2672   | 55.9137   | 132.588    |
| MPRK1     | Amaranthaceae | Salicornia persica     | Present Study   | OM039318           | OM039353   | OM039386 | Ras Al-Khaimah       | North Ras Al-Khaimah | 25.884526 | 56.012964 | 0          |
| MPUQ7     | Amaranthaceae | Salicornia persica     | Present Study   | OM039317           | OM039352   | OM039385 | Umm Al-Quwain        | Al Salamah           | 25.535792 | 55.633383 | 4          |
|           | Amaranthaceae | Salsola imbricata      | GenBank         | KU984715.1         | NA         | NA       |                      |                      |           |           |            |
| MPAD8     | Amaranthaceae | Salsola imbricata      | Present Study   | OM039314           | OM039349   | OM039382 | Abu Dhabi            | Nahel                | 24.546081 | 55.659862 | 256        |
| MPAJ6     | Amaranthaceae | Salsola imbricata      | Present Study   | OM039316           | OM039351   | OM039384 | Ajman                | Wadi Helio 2         | 25.379895 | 55.601075 | 29.555988  |
| MPSH26    | Amaranthaceae | Salsola imbricata      | Present Study   | OM039315           | OM039350   | OM039383 | Sharjah              | Al-Dhaid             | 25.2866   | 55.9143   | 131.064    |
| MPSH69    | Amaranthaceae | Salsola imbricata      | Present Study   | OM039313           | OM039348   | OM039381 | Sharjah              | Al-Dhaid             | 25.284444 | 55.913611 | 130        |
| MPSH54    | Amaranthaceae | Suaeda aegyptiaca      | Present Study   | OM039307           | OM039342   | OM039375 | Sharjah              | Kalba                | 25.00245  | 56.349646 | 2          |
| MPUQ13    | Amaranthaceae | Suaeda aegyptiaca      | Present Study   | OM039308           | OM039343   | OM039376 | Umm Al-Quwain        | Umm Al-Quwain        | 25.538064 | 55.63793  | -14.005587 |
| MPSH38    | Amaranthaceae | Suaeda vermiculata     | Present Study   | OM039305           | OM039340   | OM039373 | Sharjah              | Al-Mirgab            | 25.384603 | 55.41867  | 5          |

|                  |                 |                         |               |            |            |          |                |                      |            |            |            |
|------------------|-----------------|-------------------------|---------------|------------|------------|----------|----------------|----------------------|------------|------------|------------|
| MPSH55           | Amaranthaceae   | Suaeda vermiculata      | Present Study | OM039306   | OM039341   | OM039374 | Sharjah        | Kalba                | 25.00245   | 56.349646  | 2          |
| MPFJ17           | Caryophyllaceae | Paronychia arabica      | GenBank       | MH185888.1 | NA         | NA       | Fujairah       | Maleha-Fujairah road | 25.129551  | 55.96085   | 188        |
|                  | Caryophyllaceae | Sclerocephalus arabicus | Present Study | OM039311   | OM039346   | OM039379 |                |                      |            |            |            |
| MPRK78           | Caryophyllaceae | Sclerocephalus arabicus | Present Study | OM039312   | OM039347   | OM039380 | Ras Al-Khaimah | Khorfakkan Road      | 25.206925  | 55.986036  | 0          |
| MPSH99           | Caryophyllaceae | Sclerocephalus arabicus | Present Study | OM039310   | OM039345   | OM039378 | Sharjah        | Malaiha fili rd      | 25.0733167 | 55.8475722 | 163        |
| MPRK60           | Chenopodiaceae  | Suaeda aegyptiaca       | Present Study | OM039309   | OM039344   | OM039377 | Ras Al-Khaimah | Khuzam Rd            | 25.766428  | 55.930024  | -7.02495   |
| MPAJ2            | Gisekiaceae     | Gisekia pharnacioides   | Present Study | OM039326   | OM039360   | OM039393 | Ajman          | Al Amerah            | 25.379873  | 55.578797  | 26.351332  |
| MPAJ3            | Gisekiaceae     | Gisekia pharnacioides   | Present Study | OM039327   | OM039361   | OM039394 | Ajman          | Al Amerah            | 25.379873  | 55.578797  | 26.351332  |
| MPAJ4            | Gisekiaceae     | Gisekia pharnacioides   | Present Study | OM039328   | OM039362   | OM039395 | Ajman          | Al Amerah            | 25.379873  | 55.578797  | 26.351332  |
| MPAJ5            | Gisekiaceae     | Gisekia pharnacioides   | Present Study | OM039329   | OM039363   | OM039396 | Ajman          | Al Amerah            | 25.379873  | 55.578797  | 26.351332  |
| MPSH68           | Gisekiaceae     | Gisekia pharnacioides   | Present Study | OM039325   | OM039359   | OM039392 | Sharjah        | Al-Dhaid             | 25.284444  | 55.913611  | 130        |
| MPRK19           | Molluginaceae   | Glinus lotoides         | Present Study | OM039324   | OM039358   | NA       | Ras Al-Khaimah | Wadi Al Qour         | 24.907628  | 56.150495  | 231.403839 |
| MPRK2            | Molluginaceae   | Glinus lotoides         | Present Study | OM039323   | OM039357   | OM039391 | Ras Al-Khaimah | South Ras Al-Khaimah | 25.139039  | 56.013942  | 222        |
| MPSH16           | Polygonaceae    | Calligonum comosum      | GenBank       | KU984716.1 | NA         | NA       | Sharjah        | Al-Dhaid             | 25.278     | 55.8277    | 115.214    |
|                  | Polygonaceae    | Calligonum crinitum     | GenBank       | KX015751.1 | NA         | NA       |                |                      |            |            |            |
|                  | Polygonaceae    | Calligonum crinitum     | Present Study | OM039330   | OM039364   | NA       |                |                      |            |            |            |
| MPSH19           | Polygonaceae    | Calligonum crinitum     | Present Study | OM039331   | OM039365   | NA       | Sharjah        | Al-Dhaid             | 25.278     | 55.8277    | 115.214    |
| MPSH126          | Portulacaceae   | Portulaca oleracea      | GenBank       | KX015736.1 | NA         | NA       | Sharjah        | Al Dhaid             | 25.233875  | 55.917013  | 132.802765 |
|                  | Portulacaceae   | Portulaca oleracea      | GenBank       | KX015737.1 | NA         | NA       |                |                      |            |            |            |
|                  | Portulacaceae   | Portulaca oleracea      | GenBank       | KX015738.1 | NA         | NA       |                |                      |            |            |            |
|                  | Portulacaceae   | Portulaca oleracea      | Present Study | OM039320   | NA         | OM039388 |                |                      |            |            |            |
| MPSH24           | Portulacaceae   | Portulaca oleracea      | Present Study | OM039319   | OM039354   | OM039387 | Sharjah        | Al-Dhaid             | 25.278     | 55.8277    | 115.214    |
| MPUQ2            | Tamaricaceae    | Tamarix aucheriana      | GenBank       | KX957750.1 | NA         | NA       | Umm Al-Quwain  |                      | 25.5139    | 55.547588  | 0          |
|                  | Tamaricaceae    | Tamarix aucheriana      | GenBank       | NA         | KY000489.1 | NA       |                |                      |            |            |            |
| MPUQ2            | Tamaricaceae    | Tamarix nilotica        | Present Study | OM039304   | OM039339   | NA       |                |                      |            |            |            |
| Total Accessions |                 |                         |               | 49         | 38         | 30       |                |                      |            |            |            |

Abbreviations: NA = Not Available.

**Table S2.** Information on ecological characteristics and medicinal benefits of studied plant species. (References: Jongbloed et al. 2003; Musa et al. 2006; Soltan and Zaki, 2009; Jain et al. 2010; Abiodun, 2010; Wagate et al. 2010; Sakkir et al. 2012; Ghasemi et al. 2013; Zain et al. 2014; Teshome and Feyissa 2015; Abaza et al. 2016; Abdelgawad, 2017; AI Naqbi, 2017; Hanif et al. 2018; Janbaz et al. 2021; Abutbul et al., 2005).

| <i>Species</i>             | <b>Growth form</b> | <b>Occurrence</b> | <b>Habitat preference</b>                                                            | <b>Parts used</b>                   | <b>Medicinal uses/ activities</b>                                                                           |
|----------------------------|--------------------|-------------------|--------------------------------------------------------------------------------------|-------------------------------------|-------------------------------------------------------------------------------------------------------------|
| <i>Amaranthaceae</i>       |                    |                   |                                                                                      |                                     |                                                                                                             |
| <i>Achyranthes aspera</i>  | Small shrub        | Not common        | Wadi bed, plantations, waste ground                                                  | Roots                               | Scorpion stings                                                                                             |
| <i>Aerva javanica</i>      | Small shrub        | Common            | Alluvial and gravel plain, mountain, plantations, sand plain, Wadi bed, waste ground | Flowers, Leaves, roots, Whole plant | Anthelmintic, antibacterial, diuretic, and for eye antimony                                                 |
| <i>Amaranthus hybridus</i> | Herbaceous         | Not common        | Alluvial plain, mountain, plantations, sand plain, Wadi bed, waste ground            | Leaves, whole plant                 | Intestinal bleeding, diarrhea, excessive menstruation, urinary tract infection, kidney and stomach ailments |
| <i>Amaranthus viridis</i>  | Herbaceous         | Not common        | Plantations, mountain, sand plain, waste ground                                      | Leaves                              | Scorpion stings, snake bites and itchy skin rash                                                            |
| <i>Atriplex leucoclada</i> | Small shrub        | Locally common    | Gravel plain, mountain, salt sheets, Wadi bed                                        | Leaves                              | Emollient, cough and sore throat                                                                            |

|                                    |                |                   |                                                                        |                              |                                                                                                                                                         |
|------------------------------------|----------------|-------------------|------------------------------------------------------------------------|------------------------------|---------------------------------------------------------------------------------------------------------------------------------------------------------|
| <i>Haloxylon persicum</i>          | Shrub          | Locally<br>common | Sand plain                                                             | Aerial parts                 | Antibacterial and antifungal                                                                                                                            |
| <i>Haloxylon<br/>salicornicum</i>  | Small<br>shrub | Common            | Gravel plain, mountain,<br>salt sheets, sand plain                     | Stems                        | Ringworm, intestinal problems and for<br>hypoglycemia                                                                                                   |
| <i>Salicornia persica</i>          | Herbaceous     | Rare              | Salt sheets, tidal area                                                | -                            | Salicornia oil is used in Traditional<br>Medicine: bronchitis, liver swelling,<br>diarrhea, hyperglycemia, anti-<br>inflammation                        |
| <i>Salsola imbricata</i>           | Small<br>shrub | Common            | Alluvial plain, gravel<br>plain, sand plain,<br>waste ground           | Whole plant,<br>aerial parts | Vascular hypertension, abdominal<br>distension, constipation indigestion,<br>diarrhea, dysentery, cold, asthma,<br>migraine, headache and inflammations |
| <i>Suaeda aegyptiaca</i>           | Herbaceous     | Common            | Gravel plain,<br>plantations, sand plain,<br>salt sheets, waste ground | Stem, leaves                 | Tooth and gum infections, snuff for<br>dizziness, headaches, hysteria, nausea,<br>calming the nervous system and<br>improving poor vision.              |
| <i>Suaeda vermiculata</i>          | Small<br>shrub | Common            | Salt sheets near coastal<br>regions and Sabkhahs                       | Stems                        | Breathing difficulty                                                                                                                                    |
| <b><i>Caryophyllaceae</i></b>      |                |                   |                                                                        |                              |                                                                                                                                                         |
| <i>Sclerocephalus<br/>arabicus</i> | Herbaceous     | Common            | Alluvial plain, gravel<br>plain, mountain, sand<br>plain, Wadi bed     | -                            | Traditional and folk medicine                                                                                                                           |

### *Gisekiaceae*

|                                  |            |               |            |             |                                                                                                                             |
|----------------------------------|------------|---------------|------------|-------------|-----------------------------------------------------------------------------------------------------------------------------|
| <i>Gisekia<br/>pharnacioides</i> | Herbaceous | Not<br>common | Sand plain | Whole plant | Swellings, purgative, aperient,<br>anthelmintic, killing roundworms,<br>destroys fat and in malfunctioning of<br>sex organs |
|----------------------------------|------------|---------------|------------|-------------|-----------------------------------------------------------------------------------------------------------------------------|

### ***Molluginaceae***

|                        |            |      |                |                        |                                                                                                            |
|------------------------|------------|------|----------------|------------------------|------------------------------------------------------------------------------------------------------------|
| <i>Glinus lotoides</i> | Herbaceous | Rare | Alluvial plain | Aerial parts,<br>Seeds | Anticancer, anti-helminthic, purgative,<br>boils, bilious attack, wounds, pains,<br>and urinary disorders. |
|------------------------|------------|------|----------------|------------------------|------------------------------------------------------------------------------------------------------------|

|                           |            |                   |                                                                 |             |             |
|---------------------------|------------|-------------------|-----------------------------------------------------------------|-------------|-------------|
| <i>Paronychia arabica</i> | Herbaceous | Locally<br>common | Gravel plain, mountain,<br>plantations, sand plain,<br>Wadi bed | Whole plant | Aphrodisiac |
|---------------------------|------------|-------------------|-----------------------------------------------------------------|-------------|-------------|

### ***Polygonaceae***

|                                |                |                   |                       |               |                  |
|--------------------------------|----------------|-------------------|-----------------------|---------------|------------------|
| <i>Calligonum<br/>comosum</i>  |                |                   | Sand plain, roadsides | Leaves, stems | Toothache, tonic |
| <i>Calligonum<br/>crinitum</i> | Small<br>shrub | Locally<br>common | Sand plain            | Aerial parts  | Antioxidant      |

### ***Portulacaceae***

|                           |            |        |                                                                           |                        |                                                                                           |
|---------------------------|------------|--------|---------------------------------------------------------------------------|------------------------|-------------------------------------------------------------------------------------------|
| <i>Portulaca oleracea</i> | Herbaceous | Common | Alluvial plain, gravel<br>plain, plantations, sand<br>plain, waste ground | Leaves, whole<br>plant | Laxative, diuretic, soothe skin,<br>bacterial dysentery, diarrhea, and<br>worm infection. |
|---------------------------|------------|--------|---------------------------------------------------------------------------|------------------------|-------------------------------------------------------------------------------------------|

### ***Tamaricaceae***

|                               |       |                   |                        |                                             |                                                                                                                                   |
|-------------------------------|-------|-------------------|------------------------|---------------------------------------------|-----------------------------------------------------------------------------------------------------------------------------------|
| <i>Tamarix<br/>aucheriana</i> | Shrub | Locally<br>common | Salt sheets            | Aerial parts                                | Colorectal cancer                                                                                                                 |
| <i>Tamarix nilotica</i>       | Shrub | Common            | Salt sheets, roadsides | Aerial parts,<br>leaves, young<br>branches, | Spleen edema, eyes sore, fever,<br>headaches, ulcer aperient, sudorific,<br>expectorant, carminative, astringent,<br>and diuretic |

---

**Table S3. List of Primers with their thermal profile used in this study.**

| Locus | Primer Id    | Sequence (5' to 3')         | Thermal Profile |                                             |                              |
|-------|--------------|-----------------------------|-----------------|---------------------------------------------|------------------------------|
|       |              |                             | Denaturation    | Annealing                                   | Extension                    |
| rbcL  | rbcLa-F      | ATGTCACCACAAACAGAGACTAAAGC  | 94°C            | 94°C-52°C-72°C                              | 72°C                         |
|       | rbcLa-R      | GTAAAATCAAGTCCACCRG         | (1 min)         | (60s-60s-90s) (30 cycles)                   | (7 min)                      |
| matK  | MatK-1RKIM-f | ACCCAGTCCATCTGGAAATCTTGGTTC | 94°C<br>(5 min) | 95°C-56°C-72°C<br>(45s-45s-45s) (35 cycles) | 72°C<br>(7 min)              |
|       | P1           |                             | 94°C            | 94°C-55°C-72°C                              | 72°C                         |
|       | MatK-3FKIM-r | CGTACAGTACTTTTGTGTTTACGAG   | (1 min)         | (30s-30s-60s)<br>(10 cycles)                | (30s-30s-60s)<br>(25 cycles) |
|       | P2           |                             | 94°C            | 94°C-48°C-72°C                              | 72°C                         |
|       | MatK_1326r   | TCTAGCACACGAAAGTCGAAGT      | (5 min)         | (60s-30s-60s) (35 cycles)                   | (7 min)                      |
| ITS2  | ITS2-S2F     | ATGCGATACTTGGTGTGAAT        | 94°C            | 94°C-53°C-72°C                              | 72°C                         |
|       | ITS4         | TCCTCCGCTTATTGATATGC        | (1 min)         | (60s-60s-90s) (30 cycles)                   | (7 min)                      |
